# Supplementary material for: Sex Differences in the Association between Night Shift Work and the Risk of Cancers: A Meta-Analysis of 57 Articles
Source: Hindawi journal article supplement (doi:10.1155/2018/7925219), 2018-11-26
Supplement: f1 [file 7925219.f1.pdf]

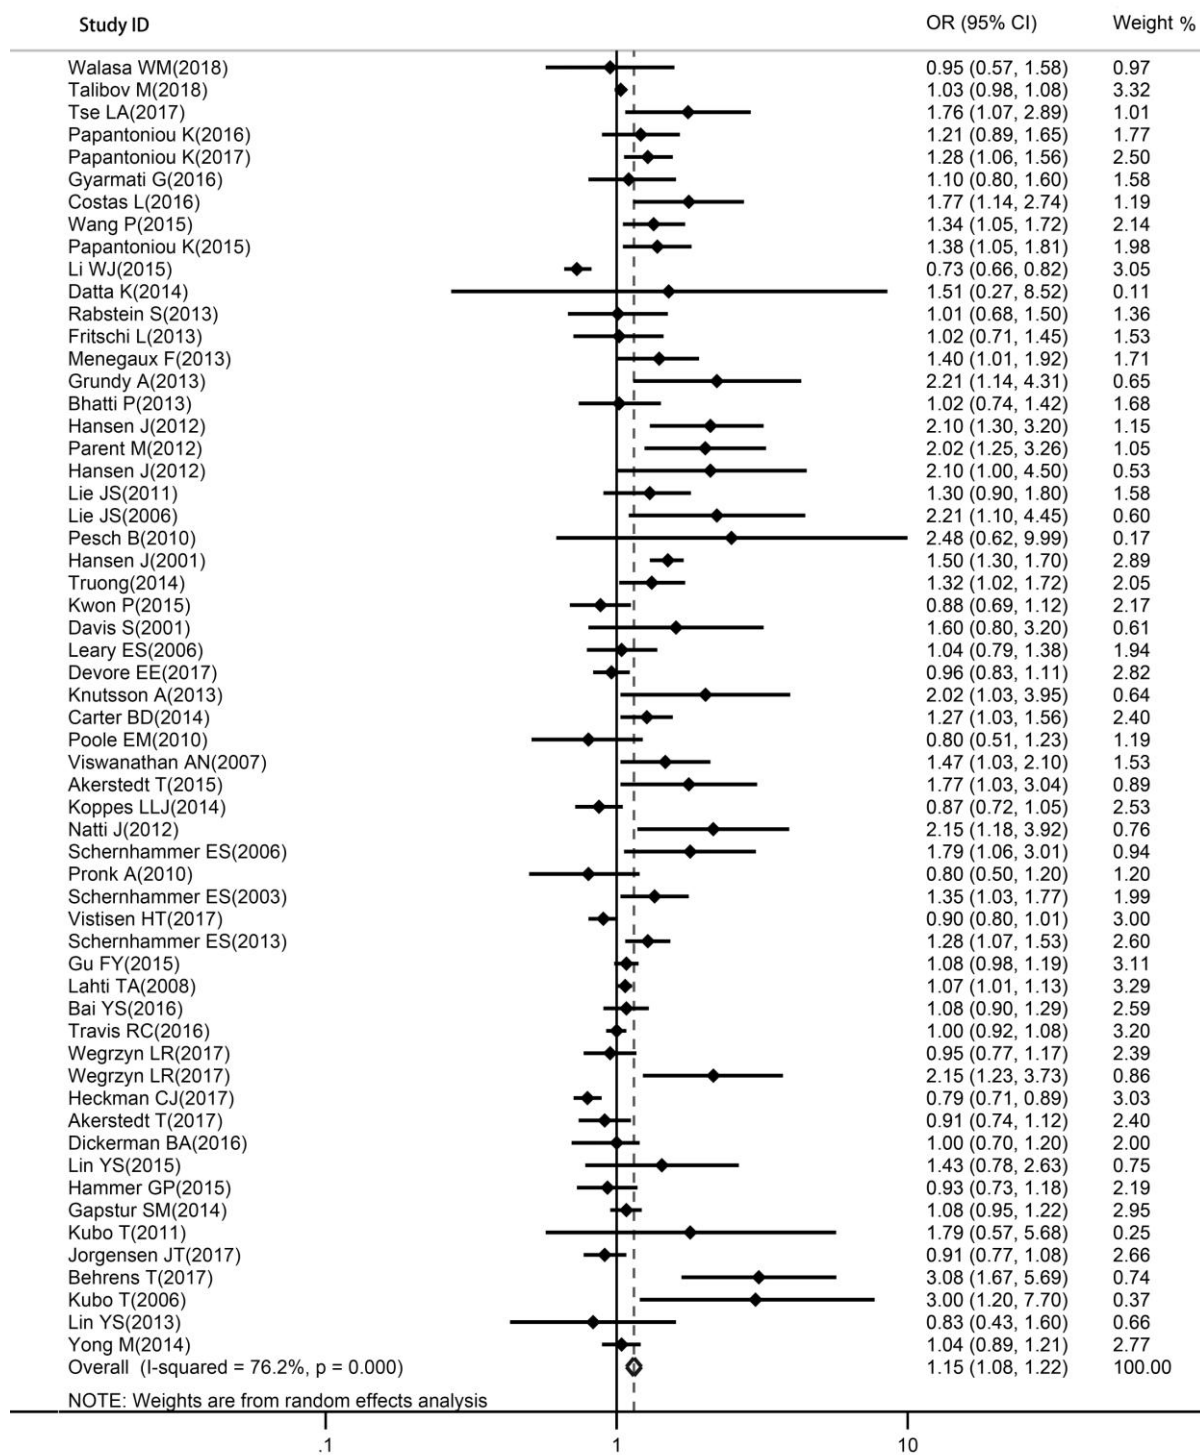

Supplementary Figure 1
